# Supplementary material for: Focusing on the ethnobotanical uses of plants in Mersin and Adana provinces (Turkey)
Source: J Ethnobiol Ethnomed. 2005 Sep 6;1:6. doi: 10.1186/1746-4269-1-6 (PMC1277086; doi:10.1186/1746-4269-1-6)
Supplement: Additional File 1 — Table 1. The list of Medicinal plants of research area [file 1746-4269-1-6-S1.pdf]

TABLE 1. LIST OF THE MEDICINAL PLANTS RECORDED IN THE RESEARCH AREA

| Botanical Families   | Botanical name                      | Local name                     | Specimen no | Part(s) used                  | Constituents                                                                              | Recommended uses by the herbalists/medicinal popular use: low (*), middle (**), high(***)                                                                                                             | Preparations                    | Records                                         |
|----------------------|-------------------------------------|--------------------------------|-------------|-------------------------------|-------------------------------------------------------------------------------------------|-------------------------------------------------------------------------------------------------------------------------------------------------------------------------------------------------------|---------------------------------|-------------------------------------------------|
| <b>Adiantaceae</b>   | <i>Adiantum capillus-veneris</i> L. | Su sumbulu                     | E.1067/M    | Lvs/M<br>Lvs/A                | Tannin, musilaj                                                                           | A,M:<br>Emmenagogue, gynecological disorders, diuretic (*)<br>A: Antitussive, expectorant, bronchial trouble (*)                                                                                      | Infusion<br>Vaporization        | C1 (3)<br>C4 (5)<br>HDD (5)<br>T (5)<br>NLH (5) |
| <b>Amaranthaceae</b> | <i>Rumex crispus</i> L.             | Labada<br>Kuzukulagi<br>Ravent | E.1390/M    | Lvs/M<br><br>Lvs/A<br>Roots/A | Vitamin A, B, C, D, E, hydroxilic acids                                                   | A,M: Purgative, anti-inflammatory, antirheumatic, stomachic, diuretic, emmenagogue, antidiarrhoeal, febrifuge, allergy, gingivitis, paludism(*)<br>A: Carminative, abortigenic, arteriosclerosis, (*) | Cataplasma<br>Decoction         | T (3)<br>C4 (5)<br>NLH (7)<br>C2 (3)<br>KY (3)  |
| <b>Anacardiaceae</b> | <i>Rhus coriaria</i> L.             | Sumak                          | E.1376/M    | Sds/M<br>Lvs/M<br><br>Sds/A   | Tannin, sugar, flavone derivatives, carotenoids                                           | A,M: Antidiarrhoeal, hemostatic, antiseptic, digestive, orexigenic, antirheumatic, diaphoretic, chollagogue, antihemorrhoidal (***)<br>A: (***)                                                       | Direct application<br>Decoction | BC (5)                                          |
| <b>Anacardiaceae</b> | <i>Pistacia terebinthus</i> L.      | Sakizotu<br>Menengic           | E.1392/M    | Sds/M                         | Turpentine, dyeing and tanning materials, phenolic compounds, triterpenoid acids, alcohol | A,M: Diuretic, cardiogenic, asthma (*)                                                                                                                                                                | Decoction                       | BC (7)                                          |

|                 |                               |                    |          |                                 |                                                                                                                    |                                                                                                                     |                                        |                             |
|-----------------|-------------------------------|--------------------|----------|---------------------------------|--------------------------------------------------------------------------------------------------------------------|---------------------------------------------------------------------------------------------------------------------|----------------------------------------|-----------------------------|
| <b>Apiaceae</b> | <i>Ammi visnaga</i> (L.) Lam. | Disotu Hiltan      | E.1171/M | Sds/M                           | Visnagin, khellol glucoside, volatile oil                                                                          | A,M: Spazmolytic, anthilitic, diuretic, antitussive, carminative, angiemphraxis, (**)                               | Direct application, Tooth-pick         | C1 (3)                      |
|                 |                               |                    | E1410/A  | Frs/A                           |                                                                                                                    | A: Kidneystones (*)                                                                                                 |                                        | T (7)<br>NLH (7)            |
| <b>Apiaceae</b> | <i>*Apium graveolens</i> L.   | Kereviz (Celery)   | E.1373/M | Sds/M                           | Terpenes, anhydrine of sedadonic acid, phenols, coumarins, funarocoumarins, coumarin glycosides, lectin, apiin [1] | A,M: Anti-inflammatory, gynecological disorders (**)                                                                | Decoction Vaporization                 | BC (1)                      |
| <b>Apiaceae</b> | <i>*Anethum graveolens</i> L. | Dere otu           | E.1356/M | Sds/M<br>Lvs/M                  | Carvone (55-70 %), limonene                                                                                        | A,M: Antiseptic, lactagogue, carminative, orexigenic, stimulant, eye inflammation, aphrodisiac (**)                 | Decoction                              | C1 (5)<br>NLH (7)<br>KY (5) |
|                 |                               |                    | E.1447/A | Flv/A<br>Stem/A                 |                                                                                                                    | A: Indigestion, goiter stress, bed-wetting (***)                                                                    |                                        |                             |
| <b>Apiaceae</b> | <i>Coriandrum sativum</i> L.  | Kisnis Zuhretaragi | E.1362/M | Frs/M<br>Lvs/M<br>Sds/M<br>SdsA | Linalool (65-80 % alcohols), terpenes                                                                              | A,M: Orexigenic, stomachic, carminative, cardiotonic, liver disorders, blood stimulant, digestive hypertension (**) | Direct application<br>Pulverized/<br>M | C1 (5)<br>T (5)<br>KY (5)   |
|                 |                               |                    | E.1431/A |                                 |                                                                                                                    | A: Anodyne (**)                                                                                                     |                                        |                             |

|                 |                                                   |                              |          |                                                                                 |                                                                                      |                                                                                                                                                                                                                                                                                 |                                       |                                      |
|-----------------|---------------------------------------------------|------------------------------|----------|---------------------------------------------------------------------------------|--------------------------------------------------------------------------------------|---------------------------------------------------------------------------------------------------------------------------------------------------------------------------------------------------------------------------------------------------------------------------------|---------------------------------------|--------------------------------------|
| <b>Apiaceae</b> | <i>Ferula communis</i> L.                         | Caksırotu<br>Cavsir otu      | E.1363/M | Sds/M<br>Roots/<br>M<br>Flv/M<br>Stem/<br>M<br>Sds/A<br>Flv/A<br>Lvs/A<br>Sds/M | Vitamins, carotens [3]                                                               | A,M: Antianemic, aphrodisiac (***)<br>A: Orexigenic, digestive, carminative, vermifuge (*)                                                                                                                                                                                      | Direct application                    | T (7)<br>NLH (7)<br>KY (7)           |
| <b>Apiaceae</b> | <i>Foeniculum vulgare</i> Miller                  | Razıyane<br>Rezene<br>Mayana | E.1364/M | Root/A<br>Lvs/A<br>Frs/A                                                        | Vol. oil, Anethole (60 %), fenchone, a ketone (20 %)                                 | A,M: Stomachic, aromatic, carminative, lactagogue, diuretic, antirheumatic, antiinflammatory, antiseptic, urinary system disorders, antitussive, antilithic, adrenal agent, obesity, purgative (***)<br>A: Sedative, anodyne, sialogogue, heart stimulant, antidiarrhoeal (***) | Decoction                             | T (7)<br>NLH (7)<br>KY (3)<br>C1 (7) |
| <b>Apiaceae</b> | <i>*Petroselinum crispum</i> (Miller) A. W. Hill. | Maydanoz                     | E.1406/M | Lvs/M<br>Stem/<br>M                                                             | Coumarins, vol. oils, terpens<br>Petroselinum spp. :<br>apiole<br>(dimethoxysafrole) | A,M: Diuretic, expectorant, cancer, urinary system disorders (**).                                                                                                                                                                                                              | Decoction<br>Infusion<br>Vaporization | BC (1)                               |
| <b>Apiaceae</b> | <i>Pimpinella anisum</i> L.                       | Anason                       | E.1373/M | Sds/M<br><br><br><br><br><br><br>Sds/A                                          | Fixed oil, vol. oil                                                                  | A,M: Orexigenic, carminative, lactagogue, anodyne, spazmolytic, digestive, diuretic, antiseptic, aromatic, tuberculosis, wounds, antitussive, aphonia, respiratory system disorders (**)<br>A: Emmenagogue (***)                                                                | Decoction<br>Paste                    | NLH (5)<br>KY (7)                    |

|                     |                                  |                                                                                         |                          |                                                |                                                                                                                                          |                                                                                                                                                                                                                            |                       |                                          |
|---------------------|----------------------------------|-----------------------------------------------------------------------------------------|--------------------------|------------------------------------------------|------------------------------------------------------------------------------------------------------------------------------------------|----------------------------------------------------------------------------------------------------------------------------------------------------------------------------------------------------------------------------|-----------------------|------------------------------------------|
| <b>Araceae</b>      | <i>Arum maculatum</i> L.         | Agu,<br>Yılan yastigi<br>Yilana agu<br>veren Mayasil<br>otu<br>Esek kulagi<br>Buzagiotu | E.1359/M                 | Root/<br>M<br>Lvs/M<br><br>Lvs/A<br>Root/<br>A | Lectin, lipid, protein                                                                                                                   | A,M: Purgative, diaphoretic,<br>antiinflammatory, stomachic,<br>diuretic, bronchial trouble,<br>antihemorrhoidal, psoriasis (*)<br>A: Orexigenic, digestive,<br>lactagogue, carminative,<br>sedative, pimples, cough, (**) | Cataplasma            | C1 (3)<br>C4 (5)<br>NLH<br>(5)<br>KY (3) |
| <b>Aspleniaceae</b> | <i>Asplenium ceterach</i> L.     | Altınbasak                                                                              | E.1454/A                 | Lvs/A                                          | Volatile oil, tannin,<br>mucilage                                                                                                        | A: Urinary system disorders (*)                                                                                                                                                                                            | Infusion              | BC (1)                                   |
| <b>Asteraceae</b>   | <i>Achillea falcata</i> L.       | Civan percemi<br>Civan percini<br>Kandil cicegi<br>Acelya                               | E.1354/M<br><br>E.1354/A | Flv/M                                          | Alcohol, essential oils,<br>salts, acids                                                                                                 | A,M: Diaphoretic, antipyretic,<br>diuretic, hypotensive,<br>astringent, urinary system<br>disorders, antiseptic,<br>emmenagogue, gynecological<br>disorders (***)                                                          | Infusion              | C3 (5)<br>NLH<br>(7)<br>KY (7)           |
| <b>Asteraceae</b>   | <i>Achillea nobilis</i> L.       |                                                                                         | E.1446/A                 | Flv/M<br>Lvs/A                                 | Achillea spp. Essential<br>oils, coumarins,<br>sesquiterpenes                                                                            | A,M: Allergy, antipruritic,<br>psoriasis (***)<br>A: Carminative, digestive,<br>cough, gripe (***)                                                                                                                         | Decoction             | HDD<br>(5)                               |
| <b>Asteraceae</b>   | <i>Anthemis</i> spp.             | Sigirpapatyasi<br>Sigir gozu<br>Okuz gozu                                               | E.1357/M<br><br>E.1445/A | Flv/M                                          | Anthemis nobilis: vol oil,<br>n-butyl angelate, isoamyl<br>angelate, 3-phenylpropyl<br>isobutyrate, tridecanal<br>pentadecanal, terpenes | A,M: Diuretic, antirheumatic,<br>ear disease, antineoplastic,<br>antitussive, bronchial trouble,<br>asthma (**)<br>A: Spasmolytic, carminative,<br>antiinflammatory, ulcer,<br>sedative, emmenagogue (***)                 | Decoction<br>Infusion | C1 (7)<br>C4 (5)<br>NLH<br>(3)<br>KY (3) |
| <b>Asteraceae</b>   | <i>Arctium tomentosum</i> Miller | Dulavrat otu<br><br>Bodurotu                                                            | E.1373/M<br><br>E.1423/A | Flv/M<br>Lvs/M<br>Root/<br>M<br>Root/<br>A     | Vol. oil, tannin                                                                                                                         | A,M: Antiinflammatory, skin<br>disorders, purgative, eczema,<br>baldness (*)<br>A: Diaphoretic, expectorant,<br>emmenagogue (***)                                                                                          | Decoction<br><br>Oil  | C1 (7)<br>T (1)                          |

|                   |                                          |                                                        |          |                                     |                                                                                   |                                                                                                                                                                                                                           |                       |                           |
|-------------------|------------------------------------------|--------------------------------------------------------|----------|-------------------------------------|-----------------------------------------------------------------------------------|---------------------------------------------------------------------------------------------------------------------------------------------------------------------------------------------------------------------------|-----------------------|---------------------------|
| <b>Asteraceae</b> | <i>Artemisia absinthium</i> L.           | Acipelin                                               | E.1358/M | Flv/M<br>Lvs/M<br>Stem/<br>M        | Artemisia spp. santonin, volatile oil, crystalline lactone, artemisin             | A,M: Orexigenic, digestive, diuretic, carminative, emmenagogue, anthelmintic, antidiarrhoeal, antianemic, antitussive, antiinflammatory, urinary- liver system disorders, diabetes (***)<br>A: Antiageing, febrifuge,(**) | Infusion<br>Decoction | T (7)<br>KY (3)<br>C1 (5) |
|                   |                                          |                                                        | E.1413/A | Lys/A<br>Flv/A                      |                                                                                   |                                                                                                                                                                                                                           |                       |                           |
| <b>Asteraceae</b> | <i>Chrysanthemum coronarium</i> L.       | Papatya (sarı papatya)                                 | E.1461/A | Lvs/A<br>Root/<br>A<br>Stem/<br>A   | Chrysanthemum spp. sesquiterpene lactones, esters, polyphenols                    | A: Digestive, (**)                                                                                                                                                                                                        | Decoction             | BC (3)                    |
| <b>Asteraceae</b> | <i>Cichorium intybus</i> L.              | Aci marul<br>Karahindiba<br>Hindiba                    | E.1375/M | Flv/M<br>Lvs/M<br>Shoot             | Inulin, sugars, coumarins, sesquiterpenes, lactones, flavone glycosides, vol. oil | A,M: Diuretic, stomachic, cardiogenic, liver disease, hepatoprotector, kidneystones (*)<br>A: Orexigenic, digestive, hematogenic, spleen, hearth ,liver disorders, rezolvent, pimples, antirheumatic (**)                 | Decoction             | T (5)<br>C1 (5)           |
|                   |                                          |                                                        | E.1427/A | /M<br>Lvs/A<br>Root/<br>A           |                                                                                   |                                                                                                                                                                                                                           |                       |                           |
| <b>Asteraceae</b> | <i>Helichrysum stoechas</i> (L.) Moench. | Sigirpapatyasi<br>Altinotu<br>Altinbasak<br>Olmezcicek | E.1376/M | Flv/M<br>Whole<br>/M<br>Plant/<br>M | Oil, tannin, resin, bitter, flavone derivates, cumarin                            | A,M: Antiinflammatory, antilithic, cough, bronchial trouble, asthma (***)<br>A: Diuretic, vulnerary, antihemorrhagic, antirheumatic, eczema (***)                                                                         | Decoction             | BC (5)                    |
|                   |                                          |                                                        | E.1416/A | Flv/A<br>Lvs/A                      |                                                                                   |                                                                                                                                                                                                                           |                       |                           |

|                      |                                  |                           |                      |                     |                                                           |                                                                                                                                                                                                                                           |                           |                           |
|----------------------|----------------------------------|---------------------------|----------------------|---------------------|-----------------------------------------------------------|-------------------------------------------------------------------------------------------------------------------------------------------------------------------------------------------------------------------------------------------|---------------------------|---------------------------|
| <b>Asteraceae</b>    | <i>Inula helenium</i> L.         | Andiz koku                | E.1377/M             |                     | Helenin, alkaloid, inulin, inulin, pigments, vol. oil [4] | A,M: Antitussive, asthma, expectorant, stomachic, diaphoretic, hepatitis, antiseptic, urinary system disorders, antipruritic, arthrosis (**)<br>A: Grippe, cough, respiratory system disorders (***)                                      | Decoction                 | C3 (7)                    |
| <b>Asteraceae</b>    | <i>Matricaria chamomilla</i> L.  | Papatya                   | E.1388/M<br>E.1445/A | Flv/M<br>Flv/A      | Sequiterpene, alcohols, ethers, oils, fatty acids, esters | A,M: Diuretic, purgative, diaphoretic, antilithic, aphrodisiac, cough, hair tonic (***)<br>A: Carminative, spasmolytic, antiinflammatory, emmenagogue, obesity, baldness, digestive, heart, respiratory system disorders, stimulant (***) | Decoction                 | C1 (7)<br>T (7)<br>KY (7) |
| <b>Asteraceae</b>    | <i>Tussilago farfara</i> L.      | Farfara otu<br>Oksurukotu | E.1311/M             | Lvs/M               | Mucilage, bitter                                          | A,M: Antitussive, respiratory system disorders (**)                                                                                                                                                                                       | Decoction                 | BC (3)                    |
| <b>Berberidaceae</b> | <i>Berberis crataegyna</i> D. C. | Kadin tuzlugu             | E.888/M              | Lvs/M               | Tannin, organic acids, vitamin C                          | A,M: Stomachic (*)<br>A:Diabetes (**)                                                                                                                                                                                                     | Decoction                 | C3 (7)                    |
| <b>Boraginaceae</b>  | <i>Anchusa italica</i> Retz.     | Sigir dili                | E.1412/A             | Stem/<br>A          | Essential oils                                            | A: Cough, nervousity, tranquillizer, bronchial trouble, lactagogue, febrifuge (*)                                                                                                                                                         | Decoction                 | HDD (7)                   |
| <b>Brassicaceae</b>  | <i>Alyssum saxatile</i> L.       | Kuduz otu                 | E.1409/A             | Root/<br>A<br>Lvs/A | Essential oils, vit. A, C, B, D, K, phosphorus            | A: Respiratory system disorders antiseptic, emetic, toothache (*)                                                                                                                                                                         | Pulverized/A<br>Decoction | BC (1)                    |

|                     |                                            |                                |                          |                                                     |                                                                         |                                                                                                                                                                                                                                         |                    |                                       |
|---------------------|--------------------------------------------|--------------------------------|--------------------------|-----------------------------------------------------|-------------------------------------------------------------------------|-----------------------------------------------------------------------------------------------------------------------------------------------------------------------------------------------------------------------------------------|--------------------|---------------------------------------|
| <b>Brassicaceae</b> | <i>Capsella bursa-pastoris</i> (L.) Medik. | Coban cantasi                  | E.1361/M                 | Frs/M<br>Flv/M<br><br>Flv/A<br>Lvs/A                | Alcohols (methanol, ethanol, isopropanol), alpha-diazoester             | A,M: Arthritis, antirheumatic, diaphoretic, hemostatic arteriosclerosis (**) A: Diuretic ,antidiarrhoeal (***)                                                                                                                          | Decoction          | C1 (7)<br>T (7)<br>NLH (7)<br>KY (3)  |
| <b>Brassicaceae</b> | <i>*Eruca sativa</i> Miller                | Roka<br>Circir<br>Kekes        | E.1391/M                 | Sds/M                                               | Vitamins, minerals, proteins, fatty acids                               | A,M: Aphrodisiac, antirheumatic, hemostatic (*) A: (***)                                                                                                                                                                                | Direct application | C3 (7)<br>KY (3)                      |
| <b>Brassicaceae</b> | <i>Nasturtium officinale</i> R. Br.        | Su teresi<br>Circir<br>Gerdeme | E.1433/A                 | Flv/A                                               | Vitamin A,C, D, vol. oil, glykozides                                    | A: Digestive, liver disorders (**)                                                                                                                                                                                                      | Direct application | HDD (7)                               |
| <b>Brassicaceae</b> | <i>Sinapis arvensis</i> L.                 | Hardal<br>Yabani hardal        | E.1278/M<br><br>E.1434/A | Flv/M<br>Frs/M<br>Sds/M<br><br>Sds/A<br>Lvs/A       | Esters, alcohol, gelatin, acids, gum, starch, alginic acid and the like | A,M: Analgesic, adrenal agent, skin disorders, gingivitis, carminative, aphrodisiac, anthelmintic (**) A: Purgative, urinary system disorders, liver disorders, antitussive, antirheumatic, sedative, bronchial trouble, toothache (**) | Decoction<br>Paste | T (5)<br>HDD (5)<br>NLH (5)<br>C1 (3) |
| <b>Buxaceae</b>     | <i>Buxus sempervirens</i> L.               | Simsir<br>Simsek agaci         | E.1360/M<br>E.1448/A     | Lvs/M<br>Flv/M<br>Lvs/A<br>Root/<br>A<br>Bark/<br>A | Resin, vol. oil, gum, alkaloids                                         | A,M: Headache, liver disease (*) A: Diaphoretic, febrifuge, diuretic, vermifuge, hair tonic (*)                                                                                                                                         | Decoction          | T (3)<br>NLH (3)<br>KY (3)<br>C1 (3)  |

|                       |                                            |                                           |                      |                          |                                                                  |                                                                                                                                                                                                                                                    |                                                            |                                                |
|-----------------------|--------------------------------------------|-------------------------------------------|----------------------|--------------------------|------------------------------------------------------------------|----------------------------------------------------------------------------------------------------------------------------------------------------------------------------------------------------------------------------------------------------|------------------------------------------------------------|------------------------------------------------|
| <b>Capparidaceae</b>  | <i>Capparis spinosa</i> L.                 | Teber Kebere                              | E.1277/M             | Frs/M<br>Frs/A<br>Flv/A  | Alks-stachydrine, glucocapparin<br>flavonoids, sterols, terpenes | A,M: Stomatitis, spleen, heart, liver disease, baldness, digestive, aphrodisiac (***)<br>A: Diuretic, antidiarrhoeal (*)                                                                                                                           | Pickle                                                     | C1 (1)<br>HDD (3)                              |
| <b>Chenopodiaceae</b> | <i>Halimione portulacoides</i> (L.) Aellen | Kaya korugu<br>Aci dam korugu             | E.1393/M             | Lvs/M                    | [5]                                                              | A,M: Diuretic, antidiarrhoeal, intestinal disorders, goiter (**)<br>A: Headache (*)                                                                                                                                                                | Decoction,<br>Cataplasma<br>Pickled fresh materials<br>Jam | BC (7)<br>C4 (5)                               |
| <b>Cupressaceae</b>   | <i>Juniperus drupacea</i> Lab.             | Andiz                                     | E.1054/M<br>E.1417/A | Frs/M<br>Sds/M<br>Frs/A  | Juniperus spp.: oil, sesquiterpenes, phenolic compounds          | A,M: Bed-wetting, arthrosis, tuberculosis, hearth stimulant, emmenagogue, asthma, antirheumatic, aphrodisiac, adrenal agent (***)<br>A: Decrease effect of cigarets (***)                                                                          |                                                            |                                                |
| <b>Equisetaceae</b>   | <i>Equisetum arvense</i> L.                | Kirkkilit otu<br>Atkuyruğu<br>Zemberekotu | E.1047/M             | Lvs/M<br>Stem/M<br>Lvs/A | Saponins, silisilik acid, tannin, alkaloids                      | A,M: Diuretic, anthilitic, hemostatic, antiinflammatory, collagogue, diaphoretic, cancer, emollient, expectorant, stomachic, urinary system disorders, disinfectant, antirheumatic, hepatoprotector, antianemic, allergy, asthma (***)<br>A: (***) | Infusion                                                   | C1 (7)                                         |
| <b>Ericaceae</b>      | <i>Erica manipuliflora</i> Salisb.         | Funda<br>Supurge otu                      | E.1147/M<br>E.1444/A | Lvs/M<br>Flv/M<br>Lvs/A  | Vol. oil, phenolic acids                                         | A,M: Diuretic, obesity, lactagogue, antidiarrhoeal, depurative, hypercholesterolemia (***)<br>A: (***)                                                                                                                                             | Infusion                                                   | T (7)<br>C1 (7)<br>NLH (7)<br>KY (7)<br>C1 (7) |
| <b>Fabaceae</b>       | <i>*Cicer arietinum</i> L.                 | Nohut                                     | E.1401/M             | Sds/M                    | Lectin.                                                          | A,M: Aphrodisiac, diaphoretic, antirheumatic, orexigenic (**)<br>A: Anodyne (*)                                                                                                                                                                    | Cataplasma,<br>Direct application                          |                                                |

|                 |                                                                                  |                            |          |                                  |                                                                                                                                                   |                                                                                                                                                                                                                                                     |                               |                                      |
|-----------------|----------------------------------------------------------------------------------|----------------------------|----------|----------------------------------|---------------------------------------------------------------------------------------------------------------------------------------------------|-----------------------------------------------------------------------------------------------------------------------------------------------------------------------------------------------------------------------------------------------------|-------------------------------|--------------------------------------|
| <b>Fabaceae</b> | <i>Glycyrrhiza glabra</i> L.                                                     | Meyan koku                 | E.1366/M | Root/<br>M                       | Glycyrrhizin, glycyrrhizic acid, flavonoids, liquiritin, isoliquertin, and other compounds, volatile compounds, stach, protein                    | A,M: Expectorant, antitussive, asthma, aphonia, anacatharsis, antiinflammatory, antidepressant, purgative, stethalgia, antiseptic, urinary system disorders, constipation, antianemic, kidneystones (***)<br>A: Ulcer, febrifuge, hypotension (***) | Decoction                     | C1 (7)<br>T (7)<br>NLH (7)<br>KY (7) |
|                 |                                                                                  |                            | E.1452/A | Root/<br>A                       |                                                                                                                                                   |                                                                                                                                                                                                                                                     |                               |                                      |
| <b>Fabaceae</b> | <i>*Lathyrus sativus</i> L.                                                      | Burcak                     | E.1367/M | Sds/M<br><br>Sds/A               | Stearic acid, thiamine, niacin, vit. B 12, E                                                                                                      | A,M: Diuretic, digestive, gingivitis, arthrosis, eczema, cancer, stomachic, diabetes (*)<br>A: Aphrodisiac, ulcer (*)                                                                                                                               | Decoction<br>Pulverized/<br>M | C1 (3)<br>NLH (7)<br>KY (3)          |
| <b>Fabaceae</b> | <i>Trigonella coerulescens</i> (Bieb.) Hal.                                      | Cemen<br>Boyotu<br>Cimen   | E.1394/M | Frs/M<br>Sds/M                   | Resin, vitamins, vol. oil, proteins, saponin                                                                                                      | A,M: Aphrodisiac, diuretic, expectorant, asthma, antihemorrhoidal, antilithic, aromatic, arthritis (**)<br>A: (**)                                                                                                                                  | Decoction<br>Pulverized/A     | HDD (7)                              |
|                 |                                                                                  |                            | E.1436/A |                                  |                                                                                                                                                   |                                                                                                                                                                                                                                                     |                               |                                      |
| <b>Fabaceae</b> | <i>*Vicia faba</i> L.                                                            | Aci bakla<br>Bakla         | E.1385/M | Frs/M                            | Resin, tannin, citric acid, vitamin E, tannic acid                                                                                                | A,M: Psilotic, diuretic, diabetes (**)<br>A: Depurative, sedative (***)                                                                                                                                                                             | Cataplasma                    | HDD (7)<br>KY (5)                    |
| <b>Fagaceae</b> | <i>Quercus</i> spp.<br><i>Q. coccifera</i> L.<br><i>Q. infectoria</i><br>Olivier | Palamut<br>Pelit<br>Pirnal | E.1199/M | Bark/<br>M<br>Frs/M<br><br>Frs/A | Tannin, gallic acid, egallic acid, sitosterol, methyl betulate, methyl olearolate, starch, calcium oxalate, nyctanthic roburic and syringic acids | A,M: Bullation, algia, antineoplastic, antilithic, cancer, stomachic (*)<br>A: Gonorrheal, antihemorrhoidal, purgative, antidiarrhoeal (*)                                                                                                          | Decoction                     | C3 (3)<br>NLH (3)<br>KY (3)          |

|                       |                                      |                            |                          |                                  |                                                                                                                                                                                                                   |                                                                                                                                                                                            |                                    |                                      |
|-----------------------|--------------------------------------|----------------------------|--------------------------|----------------------------------|-------------------------------------------------------------------------------------------------------------------------------------------------------------------------------------------------------------------|--------------------------------------------------------------------------------------------------------------------------------------------------------------------------------------------|------------------------------------|--------------------------------------|
| <b>Gentianaceae</b>   | <i>Centaurium erythrae</i> Rafn.     | Kirmizi kantaron           | E.1135/M<br>E.1029/M     | Flv/M<br>Flv/A<br>Lvs/A<br>Frs/A | Vol. oil, resin, bitter                                                                                                                                                                                           | A,M: Orexigenic (**)<br><br>A: Indigestion, wounds, spazmolitic, ulcer, sedative, antiseptic (***)                                                                                         | Decoction                          | T (7)<br>C1 (3)                      |
| <b>Hamamelidaceae</b> | <i>Liquidambar orientalis</i> Miller | Gunluk                     | E.1369/M<br><br>E.1432/A | Br/M<br><br>Root/A               | Cinnamic acid (balsamic acids), phenylethylene (styrene), cinnamic esyers, vanillin free cinnamic acid, monoterpenes, phenylpropanes, aliphatic acids                                                             | A,M: Antiseptic, fumigant, psychotonic, mnemasthenia, stammer (**)<br>A: Disinfectant, vulnerary, expectorant, nervosity, emollient (***)                                                  | Vaporization                       | T (7)<br>NLH (5)<br>KY (5)<br>C1 (7) |
| <b>Hypericaceae</b>   | <i>Hypericum perforatum</i> L.       | Kantaron<br>Binbirdelikotu | E.1293/M<br><br>E.1442/A | Flv/M<br><br>Flv/A               | Anthraquinones; hypericin, pseudohypericin, prenylated phloroglucinol phloroglucinol derivatives; hyperforin, adhyperforin, furohyperforin, flavonoids, volatile oil, vitamin C, tannins, carotenoids, aminoacids | A,M: Spazmolytic, antidiarrhoeal, sedative, antiseptic, stomachic hepatitis, hemostatic, vulnerary, chollagogue, hepatoprotector, antiinflammatory (***)<br>A: Orexigenic, digestive (***) | Decoction<br>Infusion              | C1 (7)<br>T (7)<br>C3 (5)            |
| <b>Iridaceae</b>      | <i>*Crocus sativus</i> L.            | Safran<br>Aspir            | E.1400/M                 | Flv/M<br>Root/M<br><br>Flv/A     | Vol. oil, carotinoid pigments, crocin, terpene, esters                                                                                                                                                            | A,M: Cardiotonic, stomachic, tranquillizer, mouth inflammations, antitussive, aphrodisiac, orexigenic, emmenagogue (**)<br>A: Ophthalmitis, toothache (***)                                | Direct application<br>Pulverized/M | T (3)<br>NLH (5)<br>KY (7)<br>C1 (7) |
| <b>Iridaceae</b>      | <i>Iris pseudacorus</i> L.           | Guz cigdemi<br>Sari susen  | E.1399/M                 | Root/M                           | Alcohol, oil, metyl esters of fatty acids                                                                                                                                                                         | A,M: Hemostatic, antiia, ambustion, fire burn, psilotic                                                                                                                                    | Direct application                 | HDD (5)                              |

|                     |                                           |                                                               |          |                     |                                                                                                                                      |                                                                                                                                                                                                                                                                                               |                            |                      |
|---------------------|-------------------------------------------|---------------------------------------------------------------|----------|---------------------|--------------------------------------------------------------------------------------------------------------------------------------|-----------------------------------------------------------------------------------------------------------------------------------------------------------------------------------------------------------------------------------------------------------------------------------------------|----------------------------|----------------------|
|                     |                                           |                                                               |          |                     |                                                                                                                                      | (**)<br>A: Gynecological disorders (*)                                                                                                                                                                                                                                                        | Pulverized/<br>M           |                      |
| <b>Juglandaceae</b> | <i>*Juglans regia</i> L.                  | Ceviz                                                         | E.1150/M | Frs/M<br>Pods/<br>M | Lectin, oil, mineral,<br>aminoacids, proteins,<br>vitamins                                                                           | A,M: Orexigenic, stomachic,<br>carminative, antiseptic,<br>antirachitic, antipoison,<br>antipruritic, antiinflammatory,<br>antihemorrhoidal, vermifuge,<br>asthma (***)<br>A: Hypercholesterolemia,<br>antidiarrhoeal (***)<br>A,M: Psilotic, ointment,<br>exanthema, eczema (**)<br>A: (***) | Direct<br>applications     | C3 (7)<br>HDD<br>(7) |
| <b>Lamiaceae</b>    | <i>Ajuga<br/>chamaepitys</i> (L.)<br>Sch. | Teyrek<br>Mayasil otu<br>Hamam otu<br>Yer selvisi<br>Yer cami | E.1095/M | Lvs/M               | Volatile oil, resin, bitter                                                                                                          |                                                                                                                                                                                                                                                                                               | Cataplasma<br>Pulverized/A | T (5)<br>HDD<br>(3)  |
| <b>Lamiaceae</b>    | <i>Lavandula<br/>stoechas</i> L.          | Karabas otu<br>Lavanta                                        | E.1368/M | Flv/M<br>Lvs/M      | L. officinalis : linalool,<br>linalyl acetate, ethyl-<br>perityl ketone                                                              | A,M: Nervosity, stethalgia,<br>epilepsy, headache, anodyne,<br>heart, blood stimulant,<br>nervosity, hypertension, throat<br>disorders (***)<br>A: Digestive, obesity (***)                                                                                                                   | Decoction                  | NLH<br>(7)<br>KY (5) |
|                     |                                           |                                                               | E.1419/A | Lvs/A               |                                                                                                                                      |                                                                                                                                                                                                                                                                                               |                            |                      |
| <b>Lamiaceae</b>    | <i>Melissa<br/>officinalis</i> L.         | Ogulotu<br>Limonotu<br>Turuncubile                            | E.1108/M | Lvs/M               | Glycosides of luteolin,<br>quercetin, apigenin,<br>kaempferol,<br>hydroxycinnamic acids,<br>caffeic, chlorogenic,<br>rosmarinic acid | A,M: Tranquillizer,<br>antidepressant, anhypnia,<br>gastric, mnemasthenia,<br>angiemphraxis, epilepsy,<br>fainting, allergy, digestive,<br>cardiotonic (***)<br>A: Hearth<br>stimulant,carminative,<br>sedative, spasmolytic,<br>diaphoretic, disinfectant (***)                              | Decoction<br>Infusion      | T (7)<br>HDD<br>(7)  |
|                     |                                           |                                                               | E.1422/A | Lvs/A               |                                                                                                                                      |                                                                                                                                                                                                                                                                                               |                            |                      |

|                  |                                          |                                                                                                     |                          |                                                  |                                                         |                                                                                                                                                                                                                                                                                                                    |                                                       |                                                          |
|------------------|------------------------------------------|-----------------------------------------------------------------------------------------------------|--------------------------|--------------------------------------------------|---------------------------------------------------------|--------------------------------------------------------------------------------------------------------------------------------------------------------------------------------------------------------------------------------------------------------------------------------------------------------------------|-------------------------------------------------------|----------------------------------------------------------|
| <b>Lamiaceae</b> | <i>*Mentha longifolia</i> (L.) Hudson    | Nane                                                                                                | E.1119/M                 | Lvs/M                                            | Essential oils, terpenoids                              | A,M: Stomachic, carminative, antineoplastic, aphrodisiac, vermifuge (***)<br>A: Diabetes, grippe (***)                                                                                                                                                                                                             | Direct application<br>Decoction<br>Direct application | T (3)<br>C3 (5)<br>NLH (5)<br>C2 (3)<br>KY (5)<br>C1 (7) |
| <b>Lamiaceae</b> | <i>Mentha pulegium</i> L.                | Yarpuz                                                                                              | E.1370/M                 | Lvs/M<br><br>Flv/A<br>Lvs/A                      | Essential oils, esters, stearic acid, alcohol, vol. oil | A,M: Heart stimulant, gingivitis, antihemorrhagic, cardiostonic, carminative, respiratory system disorders, diabetes, emmenagogue (**)<br>A: Orexigenic, digestive, expectorant(**)                                                                                                                                | Decoction<br>Cataplasma                               | T (3)<br>C3 (5)<br>NLH (5)<br>C2 (3)<br>KY (5)           |
| <b>Lamiaceae</b> | <i>Micromeria myrtifolia</i> Boiss&Hohen | Dagcayi                                                                                             | E.1114/M                 | Stem/M                                           | Vol. oil                                                | A,M: Stomachic, throat disorders, bullation (*)<br>A: Grippe, stomatic (***)                                                                                                                                                                                                                                       | Decoction                                             | C3 (7)                                                   |
| <b>Lamiaceae</b> | <i>*Ocimum basilicum</i> L.              | Reyhan<br>Feslegen                                                                                  | E.1371/M<br><br>E.1439/A | Lvs/M<br>Sds/M<br><br>Lvs/A                      | Vol. oil, terpenoids, saponins, alkaloids               | A,M: Purgative, antidepressant, vulnerary, antirheumatic, antidiarrhoeal (***)<br>A: Orexigenic, digestive, carminative, antiinflammatory (***)                                                                                                                                                                    | Infusion<br><br>Direct application                    | T (7)<br>NLH (7)                                         |
| <b>Lamiaceae</b> | <i>Origanum majorana</i> L.              | Feslegen<br>Balikotu<br>Mercankosk<br>Merzacus<br>Merdegus<br>Gelinguvey<br>cicegi<br>Bilyeli kekik | E.1387/M                 | Lvs/M<br><br><br><br><br><br>Lvs/A<br>Stem/<br>A | Vol. oil, terpenoids, tannins, alkaloids                | A,M: Bed-wetting, sedative, disinfectant, carminative, sudoral, antidiarrhoeal, urinary system disorders, abepithymia, cirrhosis, grippe, bronchial trouble, diuretic, digestive, analgesic (***)<br>A: Orexigenic, spasmolytic, antitussive, gingivitis, indigestion, emmenagogue, asthma, obesity antirheumatic, | Infusion<br>Decoction<br>Direct application<br>Oil/M  | KY (5)<br>C2 (3)<br>C4 (3)                               |

antiinflammatory, (\*\*\*)

|           |                                  |                                       |          |                |                                                                |                                                                                                                                                                                              |                       |                           |
|-----------|----------------------------------|---------------------------------------|----------|----------------|----------------------------------------------------------------|----------------------------------------------------------------------------------------------------------------------------------------------------------------------------------------------|-----------------------|---------------------------|
| Lamiaceae | <i>Rosmarinus officinalis</i> L. | Biberiye<br>Hamisebahar<br>Kusdiliotu | E.1377/M | Lvs/M          | Borneol, linalool (10-18 %), bornyl acetate, terpenes, cineole | A,M: Asthma, epilepsy, bullation, anhypnia, hepatitis, spleen disorders, cephalalgia, bronchial trouble, digestive, hypercholesterolemia, antidiarrhoeal, respiratory system disorders (***) | Infusion<br>Decoction | C1 (9)<br>T (7)<br>KY (7) |
|           |                                  |                                       | E.1453/A | Lvs/A<br>Flv/A |                                                                | A: Stimulant, psychotonic, antiageing, orexigenic, febrifuge, diuretic, carminative, vulnerary, antirheumatic, hair tonic, hypertension (***)                                                |                       |                           |
| Lamiaceae | <i>Salvia fruticosa</i> Miller   | Adacayi                               | E.1456/A | Lvs/M<br>Lvs/A | Salvia spp. volatile oil, thujone, cineole, borneol            | A,M: Prostate, liver disorders, ulcer, digestive, orexigenic(**)<br>A: Sedative, antiseptic, carminative, spicery, antiageing (**)                                                           | Decoction             | T (7)<br>KY (7)<br>C1 (9) |

|                  |                                                                                     |                 |          |                                   |                                                                                            |                                                                                                                                                                                                                                                                       |                                 |                                             |
|------------------|-------------------------------------------------------------------------------------|-----------------|----------|-----------------------------------|--------------------------------------------------------------------------------------------|-----------------------------------------------------------------------------------------------------------------------------------------------------------------------------------------------------------------------------------------------------------------------|---------------------------------|---------------------------------------------|
| <b>Lamiaceae</b> | <i>Sideritis congesta</i> P.H. Davis & Hub.-Mor.                                    | Adacayi Dagcayi | E.1379/M | Flv/M<br>Frs/M                    | Vol. oil, tannin, bitter                                                                   | A,M: Disinfectant, carminative, stimulant, regulatory hormone, antitussive, orexigenic, conservative, cough (**)<br>A: Digestive, diuretic, emmenagogue, abortigenic, sedative, hypoglicemian, antiageing (***)<br>A: Urinary system disorders, diabetes, eczema (**) | Infusion<br>Decoction           | BC (7)                                      |
|                  |                                                                                     | Ballibaba       | E.1418/A | Lvs/A<br>Flv/A                    |                                                                                            |                                                                                                                                                                                                                                                                       |                                 |                                             |
| <b>Lamiaceae</b> | <i>Teucrium polium</i> L.                                                           | Yavsan          | E.1428/A | Lvs/A<br>Stem/<br>A               | Vol. oil                                                                                   |                                                                                                                                                                                                                                                                       | Decoction                       | BC (7)                                      |
| <b>Lamiaceae</b> | <i>Thymus</i> spp.<br><i>T. sipyleus</i> Boiss,<br><i>T. cilicicus</i> Boiss & Bal. | Kekik           | E.1024/M | Flv/M                             | Thymus spp. thymol<br>Terpenoids, saponins, alkaloids                                      | A,M: Hypotension, remedy alcohol poisoning (***)<br>A: Emollient, toothache (***)                                                                                                                                                                                     | Decoction<br>Direct application | T (7)<br>HDD<br>(7)<br>NLH<br>(7)<br>C1 (7) |
|                  |                                                                                     |                 | E.117/M  | Lvs/M                             |                                                                                            |                                                                                                                                                                                                                                                                       |                                 |                                             |
|                  |                                                                                     |                 | E.1435/A | Stem/<br>M                        |                                                                                            |                                                                                                                                                                                                                                                                       |                                 |                                             |
| <b>Lauraceae</b> | <i>Laurus nobilis</i> L.                                                            | Defne           | E.1378/M | Lvs/M                             | Essential oils                                                                             | A,M: Diuretic, antirheumatic, orexigenic, digestive, carminative, stomachic, asthenic, artrosis, diaphoretic, antilithic, antidiarrhoeal, anacatharsis, baldness, emollient, tranquillizer (**)<br>A: Disinfectant, bronchial trouble, anodyne , hair tonic (***)     | Decoction<br>Direct application | C1 (7)                                      |
|                  |                                                                                     |                 | E.1443/A | Lvs/A<br>Frs/A<br>Root/<br>A      |                                                                                            |                                                                                                                                                                                                                                                                       |                                 |                                             |
| <b>Liliaceae</b> | <i>*Allium cepa</i> L.                                                              | Sogan           | E.1402/M | Lvs/M<br>Bulb/<br>M<br>Pods/<br>M | Fructan diosynthetic enzymes, beta-amino-alpha-cyanoacrylates, lectin, carboxylamides, oil | A,M: Antiinflammatory, carminative, purgative, gynecological disorders, emmenagogue, obesity(**)<br>A: Orexigenic, indigestion, disinfectant, hypoglycemician,                                                                                                        | Cataplasma<br>Infusion          | C1 (7)                                      |

|                      |                                           |                                          |                      |                                       |                                                                                             |                                                                                                                                                                                                                                                                           |                       |                              |
|----------------------|-------------------------------------------|------------------------------------------|----------------------|---------------------------------------|---------------------------------------------------------------------------------------------|---------------------------------------------------------------------------------------------------------------------------------------------------------------------------------------------------------------------------------------------------------------------------|-----------------------|------------------------------|
|                      |                                           |                                          |                      | Lvs/A<br>Stem/<br>A                   |                                                                                             | diuretic, wounds (***)                                                                                                                                                                                                                                                    |                       |                              |
| <b>Liliaceae</b>     | <i>Urginea<br/>maritima</i> (L.)<br>Baker | Ada sogani                               | E.1383/M<br>E.1458/A | Lvs/M                                 | Glucoscallaren A,<br>glycosides, flavonoids,<br>sinistrin, inulin,<br>mucilage, antocyanins | A,M: Vulnerary, ophidism,<br>antirheumatics (**)<br>A: (*)                                                                                                                                                                                                                | Cataplasm             | KY (7)                       |
| <b>Linaceae</b>      | <i>*Linum<br/>catharticum</i> L           | Keten<br>Zeyrek<br>Cayirkeneviri         | E.1264/M<br>E.1420/A | Sds/M<br>Sds/A                        | Fatty acids, esters,<br>potassium                                                           | A,M: Tranquillizer, demulcent,<br>purgative, antitussive,<br>emollient, anodyne, resolvent,<br>allergy, antirheumatic,<br>cardiotonic, urinary system<br>disorders, digestive,<br>antiinflammatory, antiageing,<br>heart- brain hemorrhage<br>(***)<br>A: Stomachic (***) | Oil                   | C1 (7)                       |
| <b>Loranthaceae</b>  | <i>Viscum album</i> L.                    | Okseotu<br>Gokceotu                      | E.1153/M<br>E.1429/A | Lvs/M<br>Stem/<br>M<br>Sds/M<br>Lvs/A | Resin, saponins, acids,<br>alkaloids, cyclitols,<br>glycoproteins,<br>polypeptides, lignans | A,M: Hypotensive, heart<br>stimulant, sedative, antitussive,<br>antineoplastic, remedy pruritus<br>(***)<br>A: Diuretic,hypertension,<br>spazmolytic, emetic ***                                                                                                          | Cataplasm             | T (7)<br>NLH<br>(7)<br>C1(7) |
| <b>Lycopodiaceae</b> | <i>Lycopodium<br/>clavatum</i> L.         | Aslan pencesi                            | E.1355/M<br>E.1408/A | Lvs/M                                 | Fixed oil, glycerides of<br>lycopodium oleic acid,<br>sugars, phytostein,<br>alkaloids      | A,M: Lactagogue, vulnerary,<br>febrifuge, headache (**)<br>A: Stomatitis(*)                                                                                                                                                                                               | Infusion<br>decoction | T (5)<br>KY (5)              |
| <b>Malvaceae</b>     | <i>Althaea<br/>officinalis</i>            | Hatmi<br>Murver<br>Melekotu<br>Ebegumeci | E.1411/A             |                                       | Mucilage; glucans,<br>arabinan,<br>polysaccharide,<br>galactose, rhamnose,                  | A,M: Digestive, expectorant,<br>ulcer (**)<br>A: Diuretic, antilithic,<br>emollient, demulcent (**)                                                                                                                                                                       | Decoction             | BC (7)                       |

|           |                     |                |          |                             |                                                                                   |                                                                                                                                                                                                                                                                                        |                               |                            |
|-----------|---------------------|----------------|----------|-----------------------------|-----------------------------------------------------------------------------------|----------------------------------------------------------------------------------------------------------------------------------------------------------------------------------------------------------------------------------------------------------------------------------------|-------------------------------|----------------------------|
|           |                     |                |          |                             | galacturonic acid, glucuronic acid, aspartic acid                                 |                                                                                                                                                                                                                                                                                        |                               |                            |
| Malvaceae | Malva sylvestris L. | Ebegumeci      | E.1271/M | Lvs/M<br>Flv/M              | Aminoacids, alcohols, liquid fats, oils, waxes, esters, sugars                    | A,M: Anodyne, cancer, antineoplastic, antitussive, stomachic, algia, anacatharsis, throat disorders (*)<br>A: Aphonia, bronchial trouble, antiinflammatory, abscess (**)                                                                                                               | Decoction                     | T (3)<br>C1 (5)            |
|           |                     |                | E.1421/A | Lvs/A<br>Flv/A              |                                                                                   |                                                                                                                                                                                                                                                                                        |                               |                            |
| Moraceae  | *Ficus carica L.    | Incir          | E.1403/M | Frs/M<br><br>Lvs/A<br>Frs/A | Latex, vitamin A, B, C, D, E enzymes, essential fatty acids, minerals             | A,M: Antitussive, gingivitis, hepatoprotector (*)<br>A: Sedative, expectorant (***)                                                                                                                                                                                                    | Direct application<br>Juice/A | C1 (7)                     |
|           |                     |                |          |                             |                                                                                   |                                                                                                                                                                                                                                                                                        |                               |                            |
| Moraceae  | *Morus nigra L.     | Dut            | E.1404/M | Frs/M<br>Lvs/M              | Flavanoides, caretinoids, vit. B, C, K1, triterpenes, sterols, salt, acids, sugar | A,M: Hypoglycemian, tranquillizer, cardiotonic, exanthema, blood stimulant, orexigenic (***)<br>A: (***)                                                                                                                                                                               | Decoction<br>Jam              | T (7)<br>C3 (7)<br>HDD (7) |
| Myrtaceae | Myrtus communis L.  | Mersin<br>Murt | E.1178/M | Lvs/M                       | Tannin, vol. oil, bitters                                                         | A,M: Antidiarrhoeal, antiseptic, orexigenic, stomachic, diuretic, cardiotonic, vulnerary, antilithic, baldness, disinfectant, antihermorrhagic, urinary system disorders, respiratory system disorders, obesity (***)<br>A: Purgative, disinfectant, antiinflammatory, digestive (***) | Decoction<br>Infusion         | T (7)                      |
|           |                     |                | E.1441/A | Lvs/A<br>Frs/A              |                                                                                   |                                                                                                                                                                                                                                                                                        |                               |                            |

|                       |                                    |                             |                                 |                                            |                                                                                       |                                                                                                                                                               |                                    |                   |
|-----------------------|------------------------------------|-----------------------------|---------------------------------|--------------------------------------------|---------------------------------------------------------------------------------------|---------------------------------------------------------------------------------------------------------------------------------------------------------------|------------------------------------|-------------------|
| <b>Oleaceae</b>       | <i>* Olea europaea</i> L.          | Zeytin                      | E.1405/M                        | Sds/M<br>Lvs/M                             | Olive oils, olein, linolein, volatile C6 alcohols, C6 aldehydes and acetylated esters | A,M: Cancer, mnemasthenia, vulnerary, phymatosis, ambustion, pimples (***)<br>A: Diabetes (**)                                                                | Direct application<br>Oil/M        | BC (7)            |
| <b>Onagraceae</b>     | <i>Epilebium angustifolium</i> L.  | Yaki otu                    | E.1144/M                        | Lvs/A<br>Lvs/M                             | Hormones, vitamin C, E, K, esters, acid, gum arabic                                   | A,M: Epilepsy, antipruritic (*)<br>A: Prostate (**)                                                                                                           | Cataplasm                          | BC (3)            |
| <b>Orchidaceae</b>    | <i>Orchis anatolica</i> Boiss.     | Salep                       | E.1455/A<br>E.1366/M<br>E.900/M | Lvs/A<br>Root/M                            | Sugar, musilage                                                                       | A,M: Expectorant, emollient, cardiogenic, aphrodisiac, emmenagogue, palsy, bronchial trouble, vermifuge (***)<br>A: Nutrient, stimulant, antidiarrhoeal (***) | Direct application<br>Pulverized/M | BC (7)            |
| <b>Paeoniaceae</b>    | <i>Paeonia mascula</i> Miller      | Sakayik Ayigulu<br>Dedegulu | E.1457/A                        | Flv/A<br>Root/A                            | Tannin, vol. oil                                                                      | A: Purgative, stomachic, chollagogue, hepatoprotector, urinary system disorders, treat joandice, hemagogue (*)                                                | Direct application<br>Decoction    | BC (3)            |
| <b>Pinaceae</b>       | <i>*Pinus pinea</i> L.             | Fistikcami                  | E.1051/M                        | Shoot s/M<br>Bark/M<br>Exudates/M<br>Sds/M | Tanning materials<br>Pinus spp: Bornyl acetate, terpenes, sesquiterpenes              | A,M: Lactagogue, tuberculosis, mnemasthenia, apocamnosis, anodyne, expectorant, antihemorrhoidal, vulnerary (**)                                              | Direct application<br>Paste        | NLH (7)           |
| <b>Plantaginaceae</b> | <i>Plantago major</i> L.           | Sinirli ot<br>Baldirikara   | E.1068/M<br>E.1426/A            | Lvs/M<br>Stem/M<br>Lvs/A                   | Mucilage, tannin                                                                      | A,M: Gingivitis, hepatitis, vulnerary, asthma, callus, analgesic, urinary system disorders, antibiotic, sedative (***)<br>A: Nervosity, grippe, cough (***)   | Decoction                          | NLH (7)<br>KY (5) |
| <b>Poaceae</b>        | <i>Cynodon dactylon</i> (L.) Pers. | Ayrik otu                   | E.1407/A                        | Frs/A<br>Flv/A                             | sodium carboxymethyl cellulose, ethyl cellulose and cellulose acetate;                | A: Diuretic, blood stimulant, emollient, prostate (***)                                                                                                       | Decoction                          | BC (3)            |

|                      |                                                            |                                                                                                    |                      |                             |                                                                                                                                                                                                                                                                                  |                                                                                                                                                                                                                                                                                                                         |                       |                                                   |
|----------------------|------------------------------------------------------------|----------------------------------------------------------------------------------------------------|----------------------|-----------------------------|----------------------------------------------------------------------------------------------------------------------------------------------------------------------------------------------------------------------------------------------------------------------------------|-------------------------------------------------------------------------------------------------------------------------------------------------------------------------------------------------------------------------------------------------------------------------------------------------------------------------|-----------------------|---------------------------------------------------|
|                      |                                                            |                                                                                                    |                      |                             | powdered tragacanth;<br>malt; gelatin; talc;<br>excipients such as cocoa<br>butter and suppository<br>waxes; oils such as<br>peanut oil, cottonseed<br>oil; safflower oil; sesame<br>oil; olive oil; corn oil<br>and soybean oil; glycols;<br>such a propylene glycol;<br>esters |                                                                                                                                                                                                                                                                                                                         |                       |                                                   |
| <b>Poaceae</b>       | <i>*Triticum<br/>vulgare</i> L.                            | Bugday                                                                                             | E.1396/M             | Sds/M                       | Lectin, fatty acids,<br>lecithins, gummi<br>arabicum, gelatine                                                                                                                                                                                                                   | A,M: Nutrient, brain and eyes<br>disorders, hematogenic,<br>tranquillizer, stomachic (**)                                                                                                                                                                                                                               | Cataplasma<br>Mask    | KY (5)                                            |
| <b>Poaceae</b>       | <i>*Zea mays</i> L.                                        | Misir puskulu                                                                                      | E.1386/M<br>E.1440/A | Frs/M                       | Oleic, linoleic acids,<br>triglycerides of the<br>palmitic, stearic acids                                                                                                                                                                                                        | A,M: Diuretic, antilithic,<br>antiinflammatory, gout,<br>antirheumatic,<br>hepatoprotector, obesity (***)<br>A: Kidney stones (**)<br>A,M: Antihemorrhoidal,<br>anacatharsis, obesity,<br>antirheumatic, hemostatic,<br>diaphoretic, hypotension,<br>stomachic,<br>kidney stones, liver disease (*)<br>A: Baldness (**) | Decoction             | T (7)<br>C3 (5)<br>NLH<br>(7)<br>KY (5)<br>KY (5) |
| <b>Polygonaceae</b>  | <i>Polygonum<br/>aviculare</i> L.<br><i>P. bistorta</i> L. | Ciyancik<br>Kurtpencesi<br>Encubar<br>Yilankoku<br>Kusekmegi<br>Madimak<br>Potuk<br>Yesil subiberi | E.1374/M             | Lvs/M<br>Flv/M<br><br>Lvs/A | Tannin, flavone                                                                                                                                                                                                                                                                  |                                                                                                                                                                                                                                                                                                                         | Infusion              |                                                   |
| <b>Portulacaceae</b> | <i>Portulaca<br/>oleracea</i> L.                           | Semizotu<br>Pirpirim<br>Tokmakan<br>Sogukluk                                                       | E.1236/M             | Lvs/M                       | Fixed oil containing b-<br>sitosterol,<br>(-)-noradrenaline,<br>antioxidants                                                                                                                                                                                                     | A,M: Sphagitis, bronchial<br>trouble (*)<br>A: Stimulant (**)                                                                                                                                                                                                                                                           | Direct<br>application | NLH<br>(7)                                        |
| <b>Primulaceae</b>   | <i>Anagallis<br/>arvensis</i> L.                           | Suluk otu                                                                                          | E.1395/A             | Lvs/A                       | Vol. oils                                                                                                                                                                                                                                                                        | A: Urinary system disorders (*)                                                                                                                                                                                                                                                                                         | Decoction             | T (3)<br>C4 (3)<br>NLH<br>(3)                     |

KY (3)

|                      |                                                                                  |                        |          |                                                |                                                                   |                                                                                                                                                                                                                                                              |                            |                      |
|----------------------|----------------------------------------------------------------------------------|------------------------|----------|------------------------------------------------|-------------------------------------------------------------------|--------------------------------------------------------------------------------------------------------------------------------------------------------------------------------------------------------------------------------------------------------------|----------------------------|----------------------|
| <b>Ranunculaceae</b> | <i>Nigella arvensis</i> L.                                                       | Corekotu<br>Siyahsusam | E.1296/M | Sds/M                                          | Fixed oil, alkaloids                                              | A,M: Diuretic, lactagogue, orexigenic, emmenagogue, cardi tonic, headache, epilepsy, grippe, digestive, baldness, carminative, stomachic (**)<br>A: (***)                                                                                                    | Oil                        | T (7)<br>HDD<br>(7)  |
|                      |                                                                                  |                        |          | Sds/A                                          |                                                                   |                                                                                                                                                                                                                                                              |                            |                      |
| <b>Resedaceae</b>    | <i>Reseda lutea</i> L.<br>or<br><i>Fumaria asephala</i> Boiss.<br>(Papaveraceae) | Sahdere                | E.1365/M | Lvs/M<br>Flv/M<br>Stem/M                       | Vitamin A, resin, OMEGA<br><br>Essential oil                      | A,M: Diuretic, depurative, angiemphraxis, tranquillizer, cholecystic, anacatharsis, eczema, hepatoprotector, antipruritic, allergy (**)                                                                                                                      | Infusion<br>Cataplasma     | BC (5)               |
| <b>Rhamnaceae</b>    | <i>Paliurus spinachristii</i> L.                                                 | Ballibaba<br>Kusekmegi | E.1389/M | Frs/M<br>Lvs/M<br><br>Root/A<br>Lvs/A<br>Flv/A | Tannin                                                            | A,M: Prostate, antiinflammatory, urinary system disorders, ia, mucosa in throat disorders, antihemorrhoidal, diaphoretic, hematogenic (**)<br>A: Diuretic, hemostatic, gynecological disorders, antianemic, liver disorders, asthma, bronchial trouble (***) | Infusion<br>Cataplasma     | BC (5)               |
| <b>Rosaceae</b>      | * <i>Armeniaca vulgaris</i> Lam.                                                 | Kayisi                 | E.1374/M | Frs/M<br><br>Lvs/A<br>Frs/A<br>Sds/A           | Oil acids, gelatine, sitosterol, lecithin, chitosans, fatty acids | A,M: Orexigenic, digestive, diuretic, carminative, emmenagogue, anthelmentic, antidiarrhoeal, antianemic, antitussive, antiinflammatory, urinary system disorders, constipation, hematogenic (***)                                                           | Direct application,<br>Jam | C1 (7)<br>HDD<br>(7) |

A: Purgative, (\*\*\*)

|                 |                                    |              |                          |                             |                                                                                                |                                                                                                                                                            |                       |                                      |
|-----------------|------------------------------------|--------------|--------------------------|-----------------------------|------------------------------------------------------------------------------------------------|------------------------------------------------------------------------------------------------------------------------------------------------------------|-----------------------|--------------------------------------|
| <b>Rosaceae</b> | <i>Agrimonia eupatoria</i> L.      | Koyun otut   | E.1371/M                 | Lvs/M<br>Flv/M<br><br>Flv/A | Fatty acids, essential oils, esters, salts                                                     | A,M: Antiinflammatory, hemagogue, emmenagogue, antilithic (*)<br>A: Indigestion, antidiarrhoeal, vulnerary, antirheumatic, aphonia, throat disorders (***) | Infusion<br>Decoction | T (3)<br>C4 (5)<br>C1 (5)<br>HDD (5) |
| <b>Rosaceae</b> | <i>Crataegus monogyna</i> Jacq.    | Alic Yemisen | E.1194/M<br><br>E.1450/A | Frs/M<br>Lvs/M<br><br>Frs/A | Crataegus : sclereids, calcium oxalate, aleurone grains, fixed oil                             | A,M: Hypertension, diuretic, antidiarrhoeal, cardiotonic, stomachic, headache, heart stimulant (**)<br>A: Arteriosclerosis, sedative (*)                   | Infusion<br>Decoction | HDD (7)<br>C1 (3)                    |
| <b>Rosaceae</b> | <i>*Cydonia oblonga</i> Miller     | Ayva         | E.1197/M                 | Sds/M<br>Lvs/M              | Mucilage, arabinose, xylose, uronic acid derivatives fixed oil, arabinose, xylose, uronic acid | A,M: Tranquillizer, preventive, pharyngotonsillitis, hypertension, liver disease, antitussive, antiseptic in skin disorders (**)                           | Infusion              | BC (5)                               |
| <b>Rosaceae</b> | <i>*Cerasus avium</i> (L.) Moench. | Kiraz        | E.1382/M                 | Stalk/M                     | Photosynthesis salts, tannin                                                                   | A,M: Heart stimulant, depurative, stomachic, antirheumatic, digestive, urinary system disorders, obesity (***)                                             | Decoction             | BC (7)                               |
| <b>Rosaceae</b> | <i>P. spinosa</i> L.               | Cakal erigi  | E.1381/M                 | Sds/M                       | Tannin, oils, capsicum, capsaicin, citric acid, resin, vitamin E                               | A,M: Insecticide, stomachic, antidiarrhoeal, lactagogue, heart stimulant, sphagitis, urinary system disorders, hypertension, alzheimer (***)               | Decoction             | BC (5)                               |

|                   |                                      |                      |          |                                     |                                                             |                                                                                                                                                                     |                                 |                                      |
|-------------------|--------------------------------------|----------------------|----------|-------------------------------------|-------------------------------------------------------------|---------------------------------------------------------------------------------------------------------------------------------------------------------------------|---------------------------------|--------------------------------------|
| <b>Rosaceae</b>   | <i>Rosa canina</i> L.                | Kusburnu             | E.1195/M | Sds/M<br>Frs/A                      | Geraniol, citronellol (70-75 % alcohols), esters            | A,M: Antidiarrhoeal, cardiotonic, hypoglycemic, diuretic, astringent, acidulous, obesity ( ** *)<br>A: Grippe, stimulant, diabetes ( ** *)                          | Decoction<br>Infusion           | T (7)<br>KY (7)                      |
| <b>Rosaceae</b>   | <i>Rubus canescens</i> D.C.          | Tilkiuzumu Bogurtlen | E.1378/M | Frs/M<br>Root/M<br>Lvs/M            | Lectin, gums, glucoproteins, alkaloids, terpenoids, terpens | A,M: Stomatitis, diuretic, antilithic, depurative, hemagogue, hypertension, dysentery, antidiarrhoeal, hypoglycemic, antitussive, orexigenic, kidney stones ( ** *) | Direct application<br>Decoction | T (7)<br>KY (5)                      |
| <b>Salicaceae</b> | <i>*Salix babylonica</i> L.          | Sogut                | E.1397/M | Bark/M<br>Lvs/M<br>Root/M<br>Lvs/A  | Salix spp. natural aspirin, glycosides, tannins             | A,M: Stomachic, hepatoprotector, phymatosis, anodyne, antihemorrhagic ( ** )<br>A: Orexigenic, febrifuge ( ** )                                                     | Decoction                       | T (5)<br>C4 (5)<br>C2 (5)<br>KY (3)  |
| <b>Solanaceae</b> | <i>Mandragora autumnalis</i> Bertol. | Adamotu              | E.1398/M | Root/M<br>Stem/M<br>Flv/M<br>Root/A | Alkaloids, atropine, the fluorescent substance scopoletin   | A,M: Aphrodisiac, analgesic, spasmolytic, narcotic, antidiarrhoeal, hypercholesterolemia ( ** *)<br>A: Anodyne emetic, purgative, eczema ( ** *)                    | Decoction                       | T (3)<br>NLH (7)<br>KY (7)<br>C1 (7) |
| <b>Solanaceae</b> | <i>Physalis alkekengi</i> L.         | Guveyfeneri          | E.1370/M | Sds/M                               | Chian turpentine                                            | A,M: Diuretic, sudatorian, hypoglycemic ( * ).                                                                                                                      | Decoction                       | BC (3)                               |

|                       |                                               |                                         |                      |                              |                                                                                                       |                                                                                                                                                                                                                                      |              |                                         |
|-----------------------|-----------------------------------------------|-----------------------------------------|----------------------|------------------------------|-------------------------------------------------------------------------------------------------------|--------------------------------------------------------------------------------------------------------------------------------------------------------------------------------------------------------------------------------------|--------------|-----------------------------------------|
| <b>Tiliaceae</b>      | <i>Tilia argentea</i><br>Desf. ex. DC.        | Ihlamur                                 | E.1382/M             | Flv/M<br>Lvs/M<br>Flv/A      | Tilia spp. : Flavonoid,<br>glycosides, mucilage,<br>volatile oil, phenolic<br>acids, proanthocyanidin | A,M: Respiratory system<br>disorders, throat disorders,<br>cardiotonic, cough (***)<br>A: Sedative, bronchial trouble,<br>diuretic,<br>(***)                                                                                         | Decoction    | C1 (9)<br>T (7)<br>KY (7)               |
| <b>Urticaceae</b>     | <i>Urtica urens</i> L.<br><i>U. dioica</i> L. | Isirgan                                 | E.1384/M             | Lvs/M<br>Stem/<br>M          | Photosium salts, vit. C,<br>asetil colin                                                              | A,M: Antirrhematic, cancer,<br>asthma, tuberculosis,<br>vulnerary, stomachic, liver<br>disease, antihemorrhoidal,<br>depurative, lactagogue, allergy,<br>antiageing (***)<br>A: Diuretic, anticoagulant,<br>antiseptic, goiter (***) | Decoction    | C1 (7)<br>T (7)<br>NLH<br>(7)<br>KY (7) |
|                       | <i>U. pilulifera</i> L.                       |                                         | E.1438/A             | Lvs/A<br>Sds/A<br>Root/<br>A |                                                                                                       |                                                                                                                                                                                                                                      |              |                                         |
| <b>Valerianaceae</b>  | <i>Valeriana</i><br><i>officinalis</i> L.     | Kediotu                                 | E.1425/A             | Root/<br>A                   | Volatile oil; esters,<br>alcohols, ketone,<br>alkaloids, valepotriates                                | A: Hypotension, sedative (*)                                                                                                                                                                                                         | Decoction    | C1 (3)                                  |
| <b>Zygophyllaceae</b> | <i>Peganum</i><br><i>harmala</i> L.           | Uzerlik                                 | E.1372/M             | Sds/M                        | Indole alks                                                                                           | A,M: Emmenagogue, narcotic,<br>sedative, diaphoretic,<br>vermifuge, diuretic, nutritive,<br>cephalalgia, antihysteria,<br>notalgia, ophtalmalgia,<br>omalgia, hand-tremble (**)                                                      | Vaporization | NLH<br>(5)<br>KY (5)                    |
| <b>Zygophyllaceae</b> | <i>Tribulus</i><br><i>terrestris</i> L.       | Deve cokerten<br>Demirdikeni            | E.1380/M             | Frs/M<br>Flv/M               | Saponin, diosgenin,<br>amide, alkaloid, fixed<br>oil, resin                                           | A,M: Heart, blood stimulant,<br>Arteriosclerosis (**)                                                                                                                                                                                | Decoction    | BC (7)                                  |
|                       |                                               | Coban<br>cokerten<br>Yalanci<br>akdiken | E.1449/A<br>E.1460/A | Frs/A<br>Lvs/A               |                                                                                                       | A: Cardotonic, treat joandice<br>(**)                                                                                                                                                                                                |              |                                         |

A: Adana, M: Mersin, C1-4: markets of Cerci Yusuf, KY: Kor Yusuf, NLH: Nursi Lokman Hekim, T: Tarsus, BC: Bilgehan Cetinkaya, HDD: Herderde deva
